# Supplementary material for: Large-scale, flexible and high-temperature resistant ZrO2/SiC ultrafine fibers with a radial gradient composition
Source: Royal Society of Chemistry journal article supplement (doi:10.1039/c4ta00347k), 2014-01-01
Supplement: c4ta00347k1.pdf [file c4ta00347k1.pdf]

## Electronic Supplementary Information

# Large-scale, flexible and high-temperature resistant ZrO<sub>2</sub>/SiC ultrafine fibers with radially gradient composition

Yingde Wang,<sup>\*a</sup> Cheng Han,<sup>a</sup> Dechuan Zheng<sup>a</sup> and Yongpeng Lei<sup>\*b,c</sup>

### FTIR spectra of PCSZ precursor solution and as-spun fibers

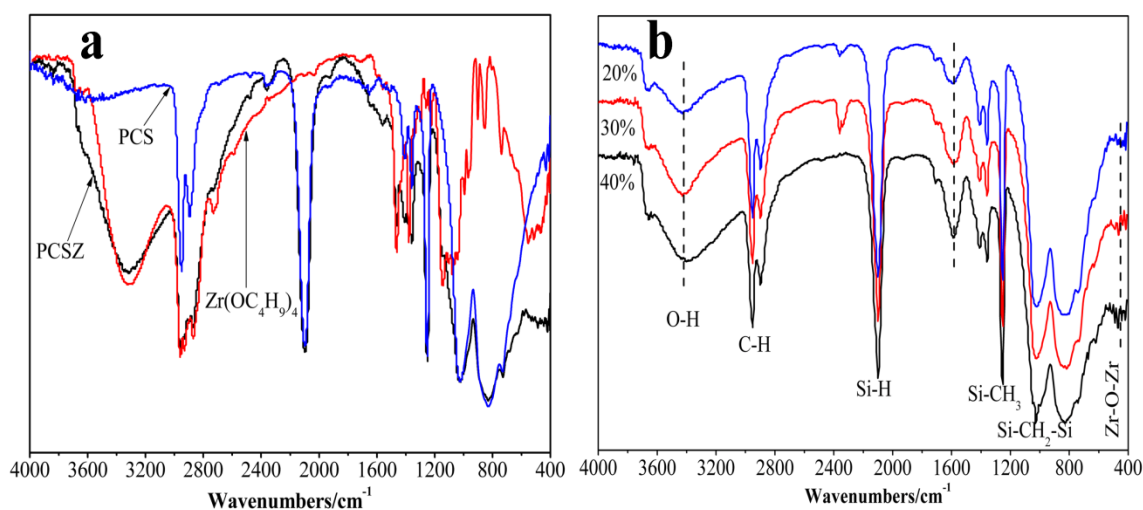

**Fig.S1** (a) Comparative FTIR spectra of PCS, Zr(OC<sub>4</sub>H<sub>9</sub>)<sub>4</sub> and PCSZ precursor solution and (b) FTIR spectra of as-spun fibers with different Zr(OC<sub>4</sub>H<sub>9</sub>)<sub>4</sub> contents

In order to understand the reciprocity between PCS and Zr(OC<sub>4</sub>H<sub>9</sub>)<sub>4</sub> in precursor solution, FTIR spectra of PCS, Zr(OC<sub>4</sub>H<sub>9</sub>)<sub>4</sub> and PCSZ were recorded respectively and showed in Fig. S1. In the FTIR of Zr(OC<sub>4</sub>H<sub>9</sub>)<sub>4</sub>, the bands at 2962, 2930 and 2872cm<sup>-1</sup> are attributed to C-H stretching vibration modes, while 1460 and 1370 cm<sup>-1</sup> are ascribed to the bending mode of C-H. The broad bands at 1142 and 1075cm<sup>-1</sup> are both assigned C-O stretching vibration and the band at 485cm<sup>-1</sup> is assigned to vibration of Zr-O-Zr mode. It could also be clearly seen that the main characteristic peaks of Zr(OC<sub>4</sub>H<sub>9</sub>)<sub>4</sub> appeared in PCSZ and did not change after mixing with PCS. And so was PCS. Also, as shown in Fig. S2b, the characteristic peaks of PCS in as-spun fibers

were not changed when the quality of  $Zr(OC_4H_9)_4$  rose from 20 to 40 wt%. These results demonstrated that there was no covalent bond between  $Zr(OC_4H_9)_4$  and PCS.

### **Large-scale as-spun fibers mat**

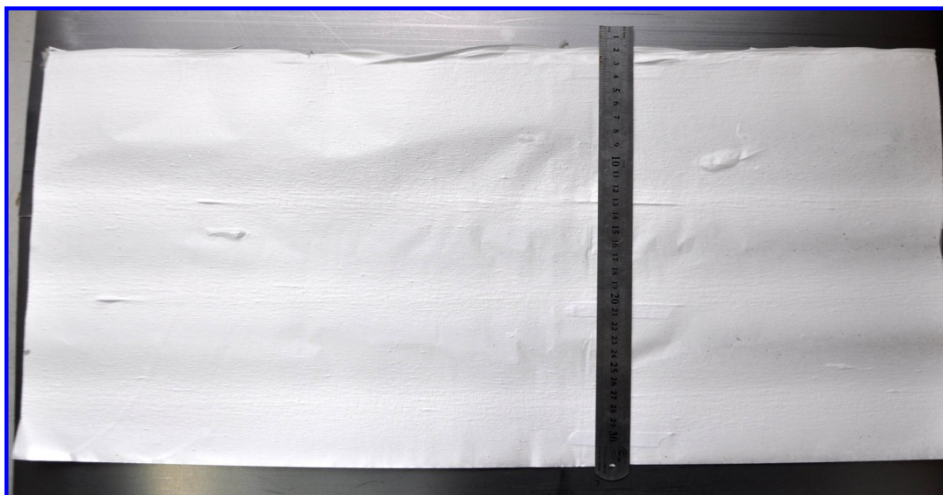

**Fig. S2** As-spun fibers mat *via* multi-needle electrospinning process

The spun large-area ( $30 \times 60 \text{ cm}^2$ ) mat in Fig. S2 were fabricated using four syringes. The area of fibrous mat can be highly increased by adding the number of syringe (see Fig. 1).
